# Supplementary material for: Photocatalytic Hydrogen Evolution from Artificial Seawater Splitting over Amorphous Carbon Nitride: Optimization and Process Parameters Study via Response Surface Modeling
Source: MDPI journal article supplement (doi:10.3390/ma15144894), 2022-07-14
Supplement: s1 [file s1]

# **Supplementary Information**

## **Photocatalytic Hydrogen Evolution via Artificial Seawater Splitting over Amorphous Carbon Nitride: Optimization and Process Parameters Study via Response Surface Modelling**

Michell K. T. Chee<sup>a</sup>, Boon-Junn Ng<sup>a</sup>, Yi-Hao Chew<sup>a</sup>, Wei Sea Chang<sup>b</sup>, Siang-Piao Chai<sup>a,\*</sup>

<sup>a</sup>Multidisciplinary Platform of Advanced Engineering, Chemical Engineering Discipline, School of Engineering, Monash University, Jalan Lagoon Selatan, Bandar Sunway, 47500 Selangor, Malaysia.

<sup>b</sup>Mechanical Engineering Discipline, School of Engineering, Monash University, Jalan Lagoon Selatan, Bandar Sunway, 47500 Selangor, Malaysia.

\*Correspondence to: [chai.siang.piao@monash.edu](mailto:chai.siang.piao@monash.edu)

## S1 Composition of sea salt

Table S1. Composition of sea salt.

| Ion                   | Conc.      | Ion        | Conc.        |
|-----------------------|------------|------------|--------------|
| Chloride              | 19230 mg/L | Silicon    | < 0.05 mg/L  |
| Sodium                | 10610 mg/L | Iron       | 0.012 mg/L   |
| Sulfate               | 2485 mg/L  | Copper     | 0.0003 mg/L  |
| Magnesium             | 1390 mg/L  | Nickel     | < 0.015 mg/L |
| Potassium             | 398 mg/L   | Zinc       | 0.008 mg/L   |
| Calcium               | 409 mg/L   | Manganese  | 0.01 mg/L    |
| Carbonate/Bicarbonate | 179 mg/L   | Molybdenum | 0.01 mg/L    |
| Strontium             | 10 mg/L    | Cobalt     | 0.0004 mg/L  |
| Boron                 | 7.6 mg/L   | Vanadium   | < 0.015 mg/L |
| Bromide               | 20 mg/L    | Selenium   | < 0.019 mg/L |
| Iodide                | 0.05 mg/L  | Rubidium   | 0.115 mg/L   |
| Lithium               | 0.26 mg/L  | Barium     | < 0.05 mg/L  |

## S2 Photoluminescence spectra of GCN and ACN

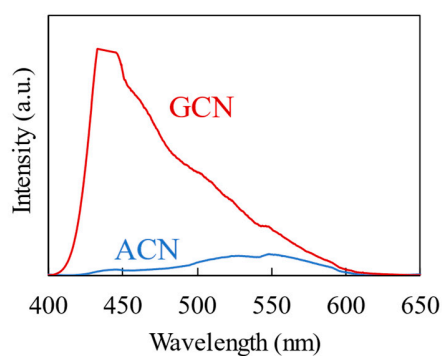

Figure S1. The photoluminescence spectra of GCN and ACN.

### S3 Field Emission Scanning Electron Microscopy of GCN

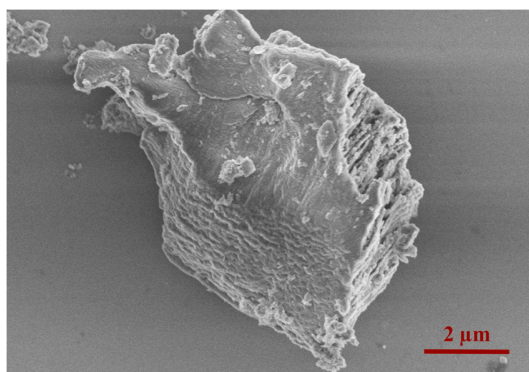

Figure S2. Field Emission Scanning Electron Microscopy of GCN.

### S4 Photocatalytic performance of GCN and ACN

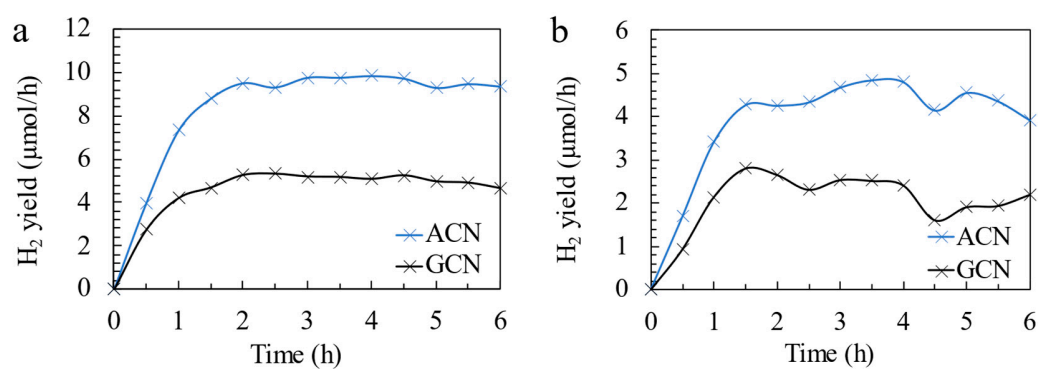

Figure S3. The photocatalytic H<sub>2</sub> production rate over 6 hours duration by GCN and ACN in (a) simulated seawater under optimum conditions calculated from RSM (2.55 g/L catalyst loading, 17.46 vol% TEOA and 45.06 g/L salinity); (b) pure water (0.75 g/L catalyst loading, 10 vol% TEOA and 0 g/L salinity).

## S5 Plots of optimum conditions at different factorial level

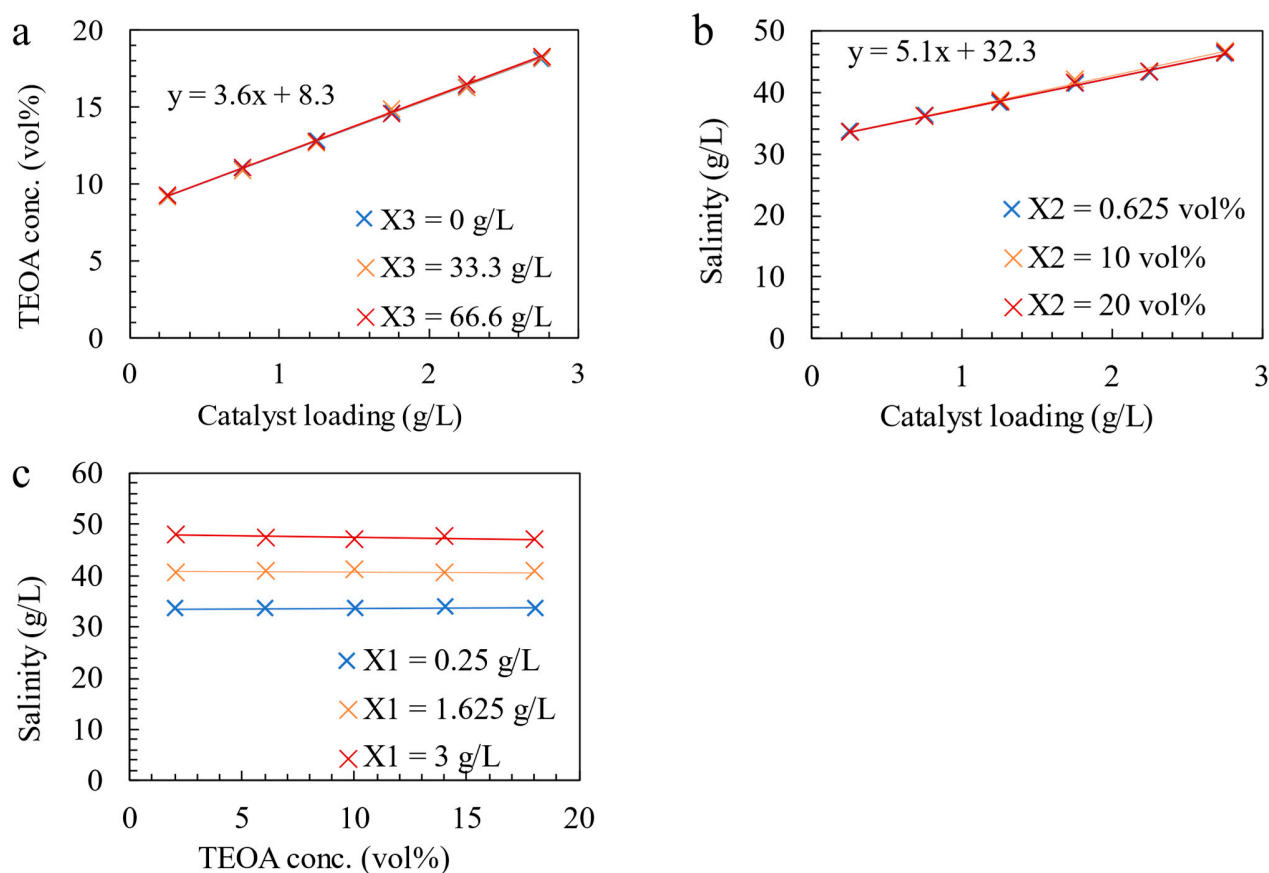

Figure S4. Plots of (a) optimum TEOA concentration against catalyst loading at 3 levels of sea salt content (-1, 0, +1); (b) optimum sea salt content against catalyst loading at 3 levels of TEOA concentration (+1, 0, -1); (c) optimum sea salt content against TEOA concentration at 3 levels of catalyst loading (+1, 0, -1).

## S6 Stability test of ACN in artificial seawater under optimum conditions

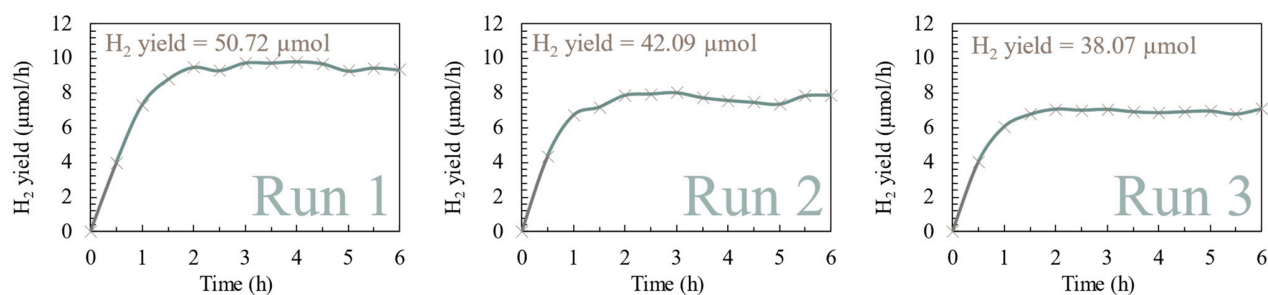

Figure S5. H<sub>2</sub> yield rate in 6 hours for 3 consecutive runs (Run 1–3) under optimum conditions (2.55 g/L catalyst loading, 17.46 vol% TEOA and 45.06 g/L salinity).
